# Supplementary material for: Effect of Abscisic Acid on Growth, Fatty Acid Profile, and Pigment Composition of the Chlorophyte Chlorella (Chromochloris) zofingiensis and Its Co-Culture Microbiome
Source: MDPI journal article supplement (doi:10.3390/life13020452), 2023-02-06
Supplement: s1 [file s1]

Supplementary Material

**Table S1.** Concentrations of compounds and ions in Bold's Basal Medium (BBM), modified from Nichols and Bold [106]

| Compounds composition                                                                            |                |                    | Ions composition |                    |
|--------------------------------------------------------------------------------------------------|----------------|--------------------|------------------|--------------------|
| Compound                                                                                         | Molar mass     | Concentration, ppm | Ions             | Concentration, ppm |
| KH <sub>2</sub> PO <sub>4</sub>                                                                  | 136.09         | 175                | PO <sub>4</sub>  | 163.1              |
| CaCl <sub>2</sub> × 2H <sub>2</sub> O/<br>Ca(NO <sub>3</sub> ) <sub>2</sub> × 4H <sub>2</sub> O* | 147.02/236.15* | 25/45*             | NO <sub>3</sub>  | 189.0              |
| MgSO <sub>4</sub> × 7H <sub>2</sub> O                                                            | 246.48         | 75                 | NH <sub>4</sub>  | 1.7                |
| NaNO <sub>3</sub>                                                                                | 84.99          | 250                | SO <sub>4</sub>  | 31.97              |
| K <sub>2</sub> HPO <sub>4</sub>                                                                  | 174.20         | 75                 | Cl               | 31.1               |
| NaCl                                                                                             | 58.40          | 25                 | P                | 53.2               |
| Na <sub>2</sub> EDTA × 2H <sub>2</sub> O                                                         | 372.24         | 10                 | N                | 7.4                |
| FeSO <sub>4</sub> × 7H <sub>2</sub> O                                                            | 278.02         | 5                  | Ca               | 11.8               |
| H <sub>3</sub> BO <sub>3</sub>                                                                   | 61.80          | 8                  | Mg               | 8.5                |
| NH <sub>4</sub> Cl                                                                               | 53.50          | 5                  | K                | 93.9               |
| Trace Metals                                                                                     |                |                    | Na               | 78.0               |
| H <sub>3</sub> BO <sub>3</sub>                                                                   | 61.80          | 2.86               | Fe               | 1.1                |
| MnCl <sub>2</sub> × 4H <sub>2</sub> O                                                            | 197.90         | 1.81               | Cu               | 0.02               |
| ZnSO <sub>4</sub> × 7H <sub>2</sub> O                                                            | 246.47         | 0.22               | Zn               | 0.23               |
| Na <sub>2</sub> MoO <sub>4</sub> × 2H <sub>2</sub> O                                             | 241.90         | 0.39               |                  |                    |
| CuSO <sub>4</sub> × 5H <sub>2</sub> O                                                            | 249.60         | 0.08               |                  |                    |
| Co(NO <sub>3</sub> ) <sub>2</sub> × 6H <sub>2</sub> O                                            | 291.00         | 0.049              |                  |                    |

\* compound used in the experiment

**Table S2.** Correlation of the parameters reflecting growth and biochemical composition of the *Chlorella zofingiensis* cells exposed to the range of ABA concentrations in BBM medium for 16 days (see also Table 2).

|                                     | ABA, $\mu\text{M}$ | Cell density,<br>$n \times 10^7$ | Biomass, g/L | TFA, $\mu\text{g}/\text{cell}$ | Ch <i>b</i> , ng/cell | CR, ng/cell | TFA/Ch <i>a</i> + <i>b</i> | TFA/CR |
|-------------------------------------|--------------------|----------------------------------|--------------|--------------------------------|-----------------------|-------------|----------------------------|--------|
| ABA, $\mu\text{M}$                  | 1.00               |                                  |              |                                |                       |             |                            |        |
| Cell density,<br>$n \times 10^7$    | 0.95               | 1.00                             |              |                                |                       |             |                            |        |
| Biomass, g/L                        | 0.97               | 0.99                             | 1.00         |                                |                       |             |                            |        |
| TFA, $\mu\text{g}/\text{cell}$      | 0.60               | 0.51                             | 0.58         | 1.00                           |                       |             |                            |        |
| Ch <i>a</i> + <i>b</i> ,<br>ng/cell | -0.81              | -0.61                            | -0.66        | -0.38                          | 1.00                  |             |                            |        |
| CR, ng/cell                         | -0.50              | -0.57                            | -0.49        | 0.35                           | 0.48                  | 1.00        |                            |        |
| TFA/Ch <i>a</i> + <i>b</i>          | 0.98               | 0.89                             | 0.93         | 0.67                           | -0.86                 | -0.41       | 1.00                       |        |
| TFA/CR                              | 0.96               | 0.90                             | 0.93         | 0.77                           | -0.75                 | -0.33       | 0.98                       | 1.00   |

Chlorophyll-a and -b (Ch*a* + *b*), total carotenoid (CR), and total fatty acid (TFA)

#### Reference:

1. Nichols, H.W.; Bold, H.C. *Trichosarcina polymorpha* gen. et Sp. nov. *J. Phycol.* **1965**, *1*, 34–38.
